# Supplementary material
Source: PubMed Central journal article supplement (PMC1070412)

**Figure 1**

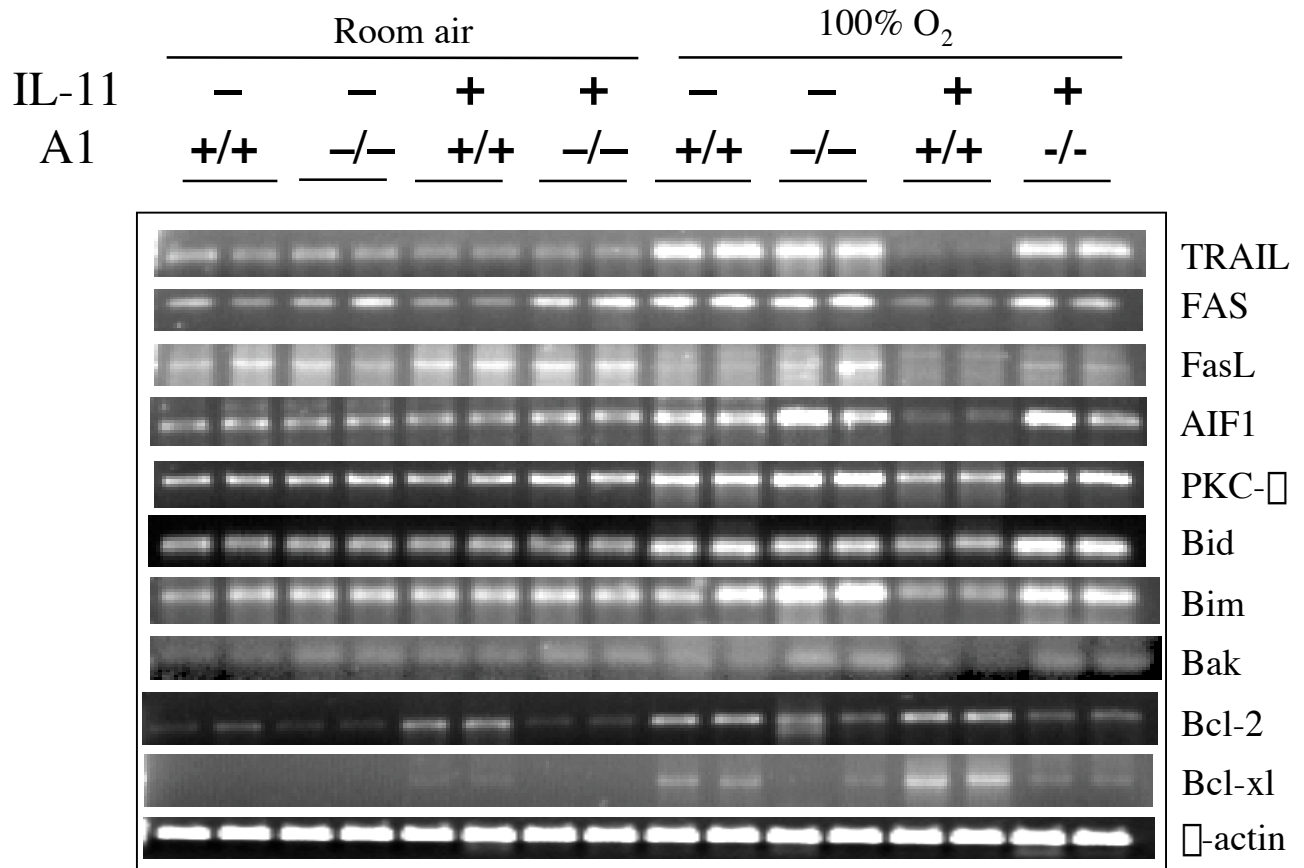

**Figures 1 and 2.** Effects of A1 on apoptosis regulators. Tg (-) and Tg (+) mice with (+/+) and (-/-) A1 loci were incubated in room air or 100% O<sub>2</sub> for 72 hours. The levels of mRNA encoding key regulators of cell death were evaluated by RT-PCR (Figure 1) or real time RT-PCR (Figure 2). The panels are representative of a minimum of 4 similar evaluations.

**Figure 2**

**Bax**

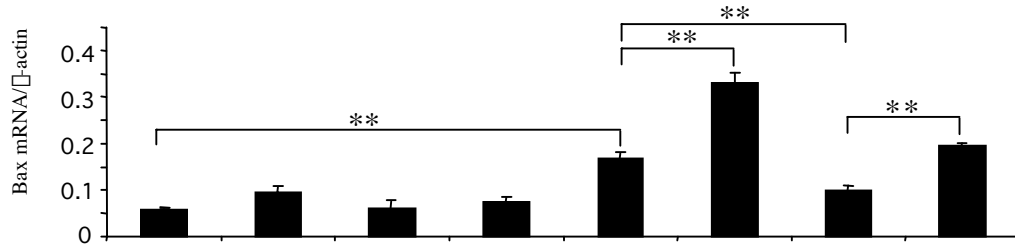

**Bad**

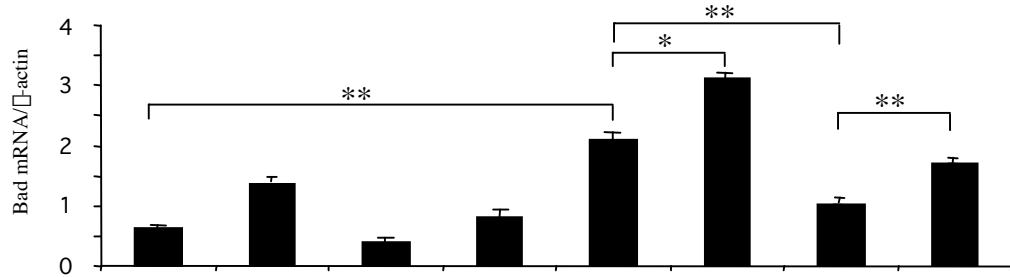

**Bak**

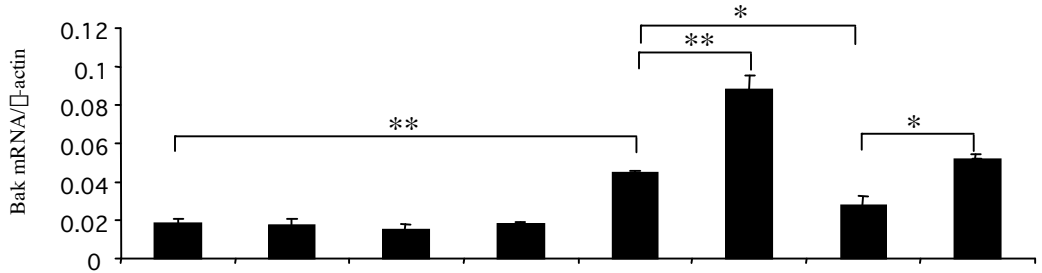

**Bid**

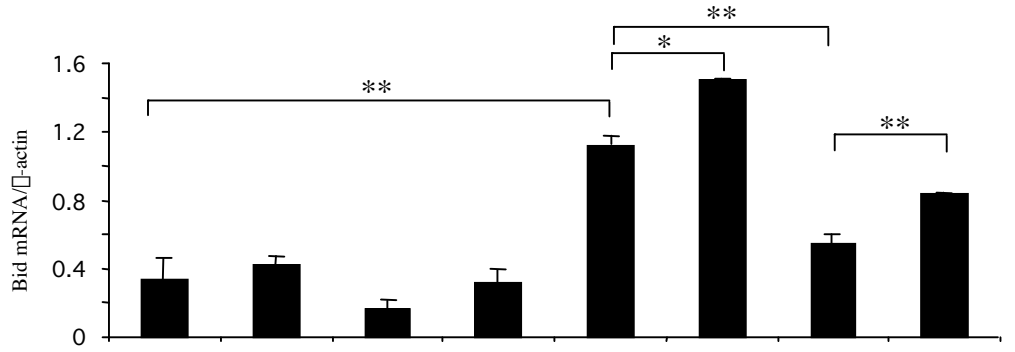

**Bim**

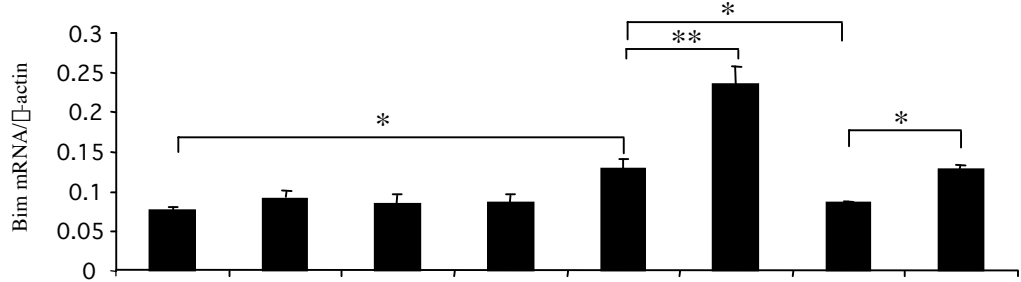

Room Air

100% O<sub>2</sub>

**IL-11**

-   -   +   +   -   -   +   +

**A1**   +/+   -/-   +/+   -/-   +/+   -/-   +/+   -/-

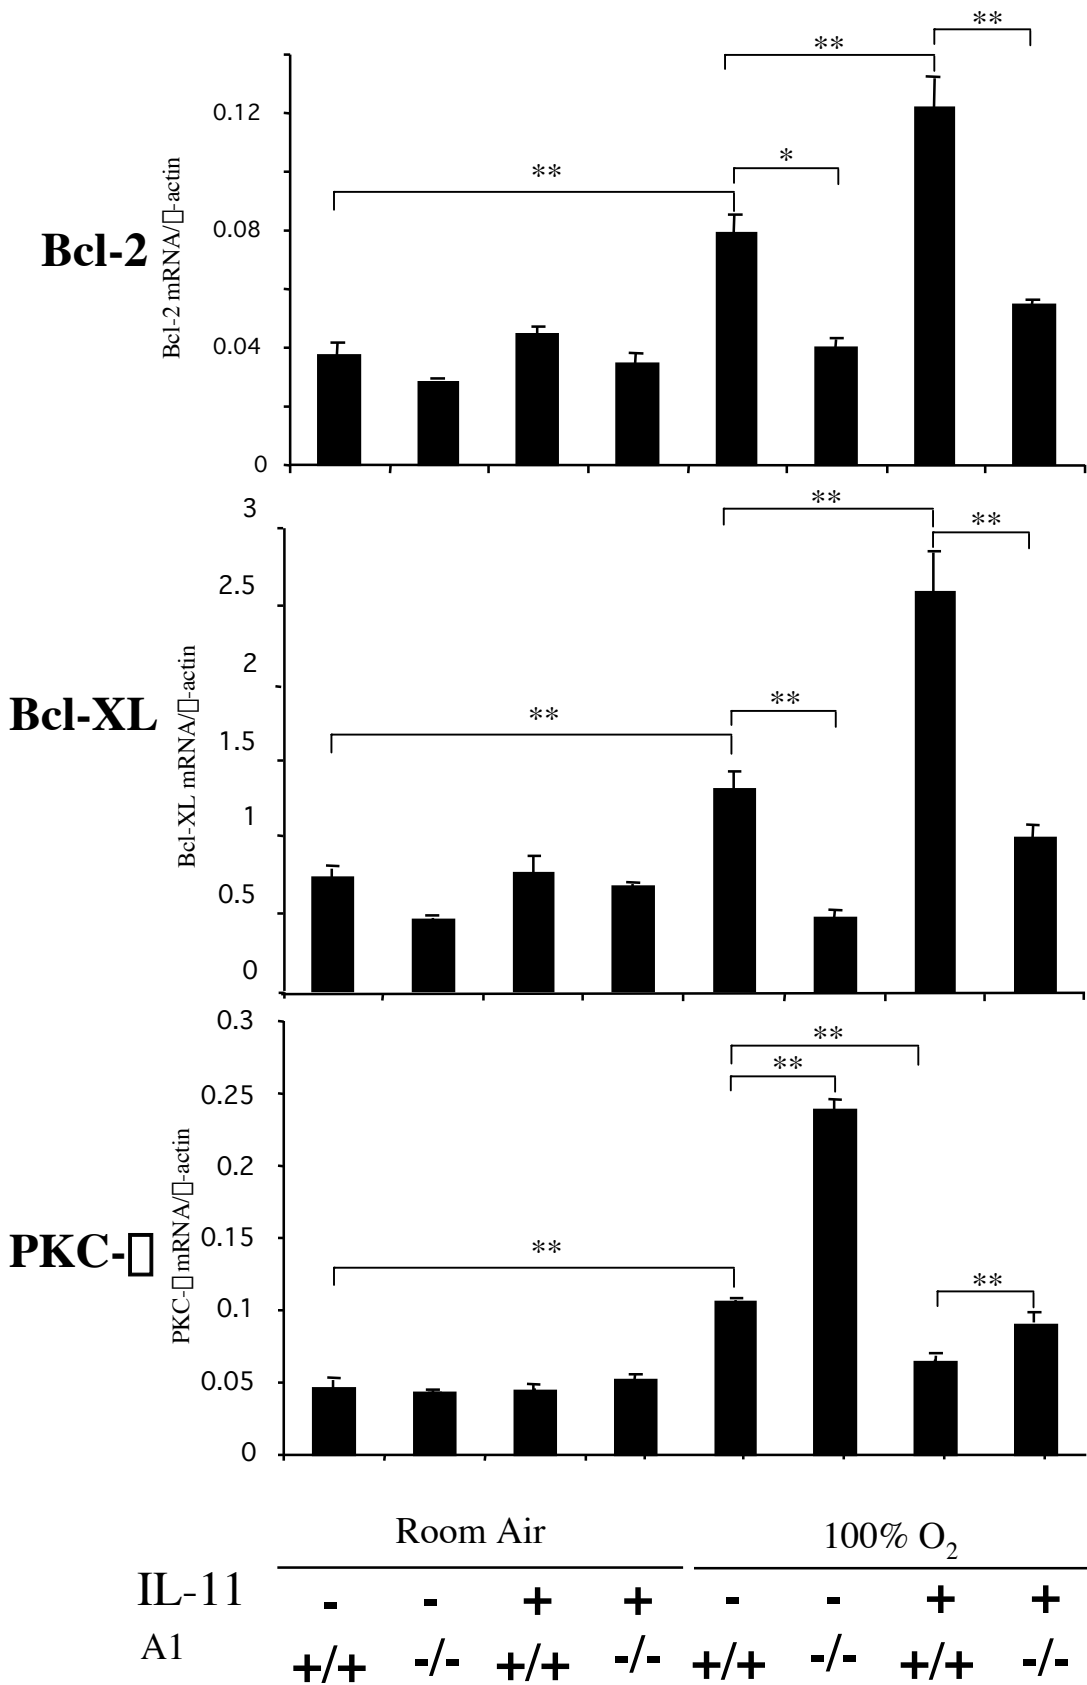

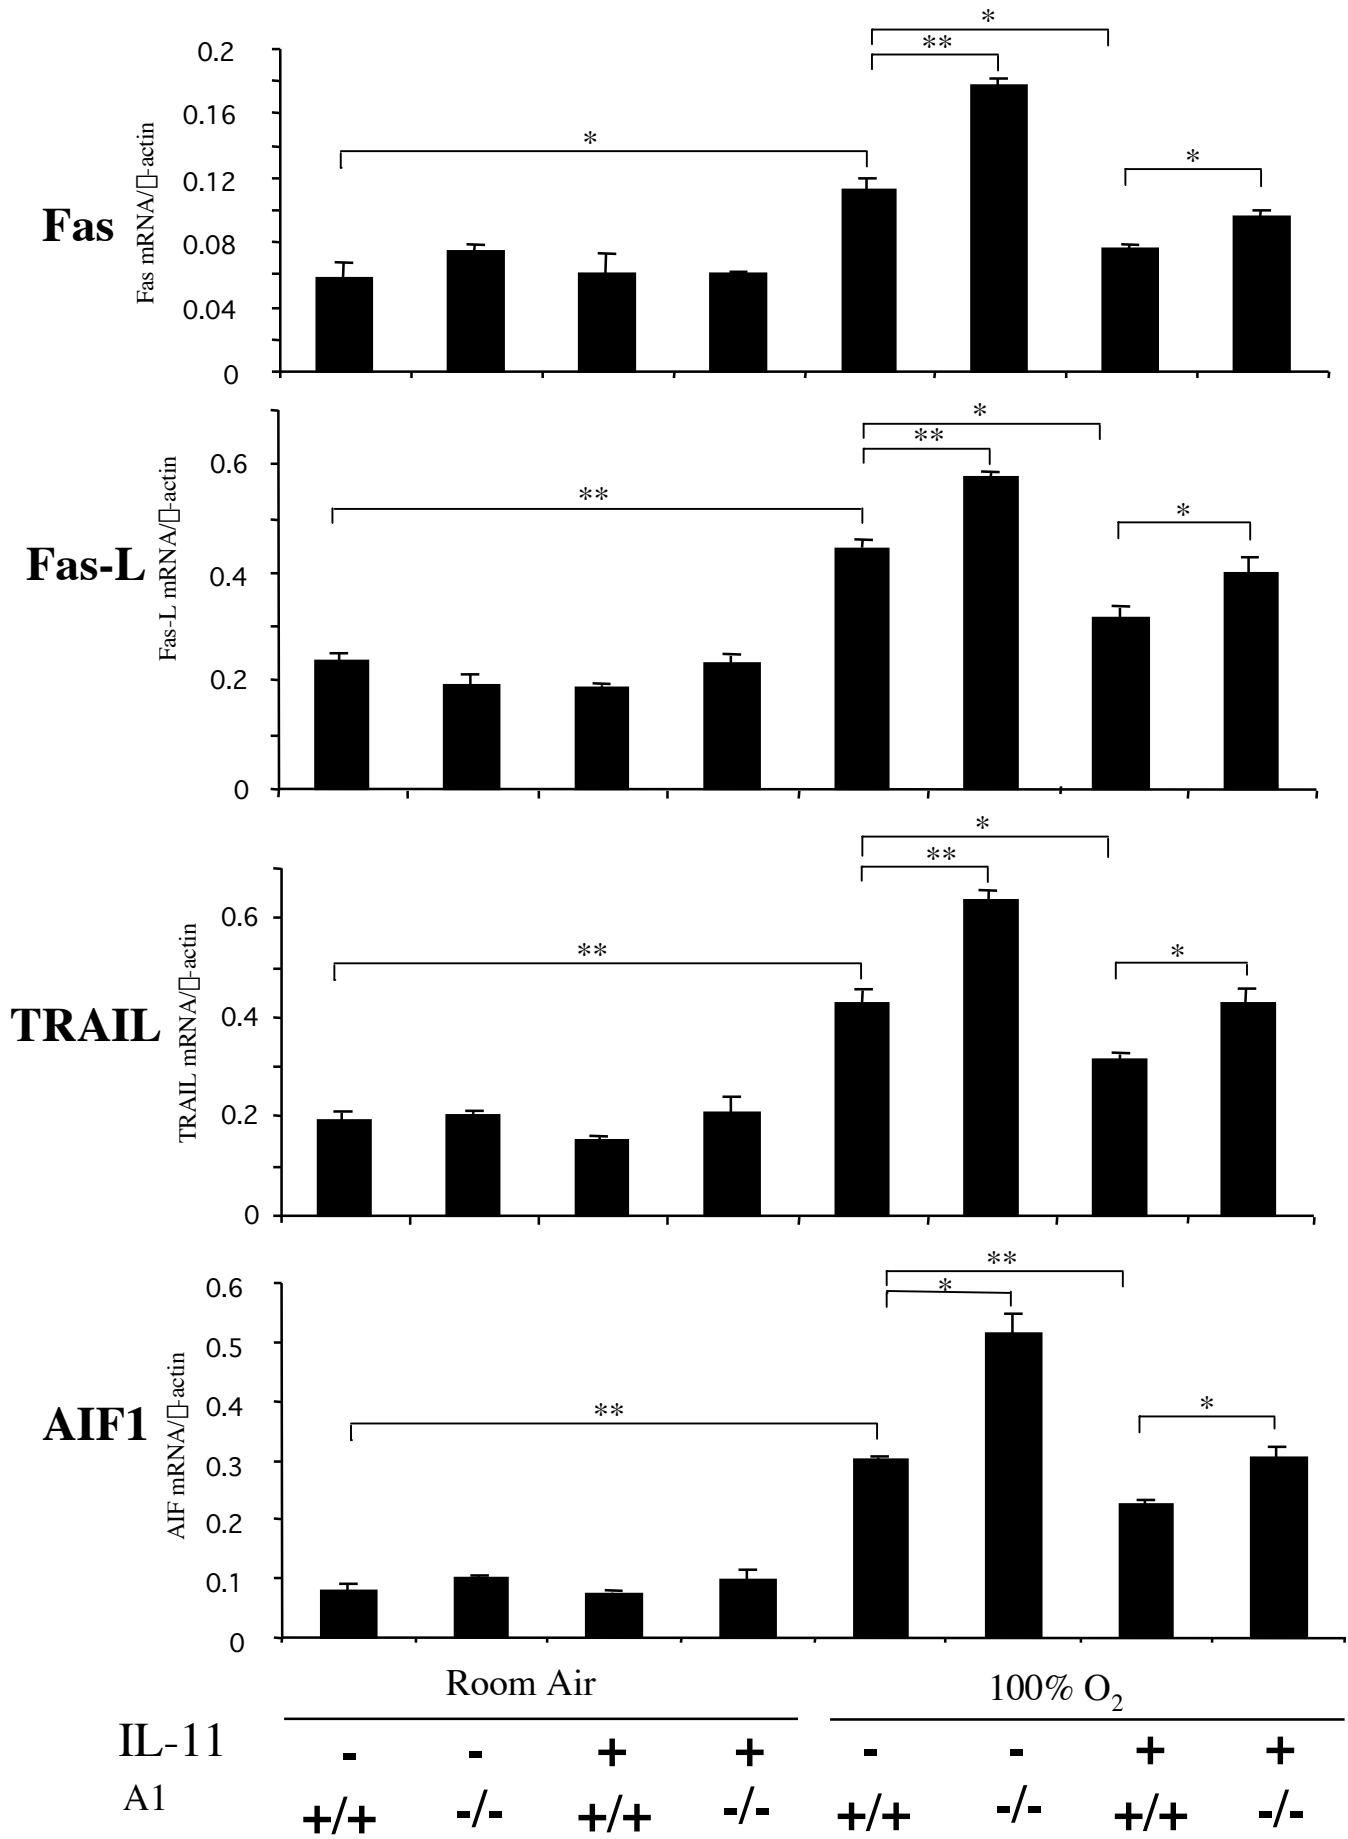

Supplement: JCI0523004sd.pdf [file JCI0523004sd.pdf]
